# Supplementary material
Source: MDPI journal article supplement (https://www.mdpi.com/2073-4395/12/4/832)
Supplement: s1 [file s1 › Supplementary data Figure S1.pdf]

## Supplementary data

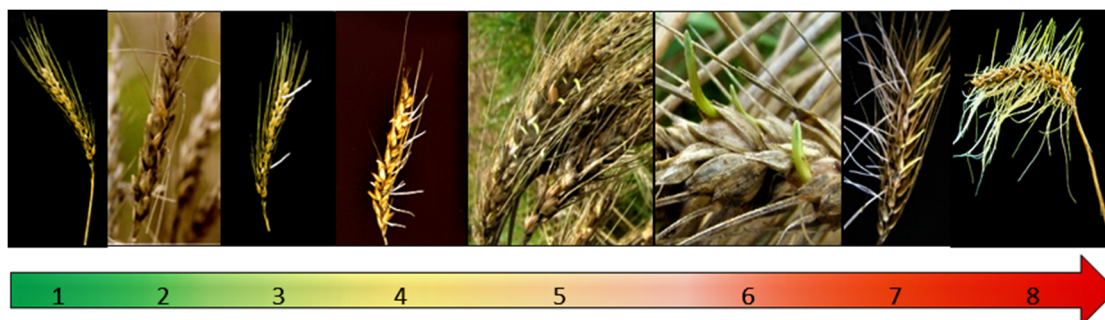

**Figure S1.** Rating scale (1 – 8) used to assign a PHS tolerance or susceptible score to the studied material (Barnard et al., 1997). Scores 1 – 3 = tolerant; 4 – 5 = moderate; 6 – 8 = susceptible.
