# Supplementary material
Source: MDPI journal article supplement (https://www.mdpi.com/2073-4395/12/4/832)
Supplement: s1 [file s1 › Supplementary data Table S1.pdf]

## Supplementary data

**Table S1.** PHS tolerance scores of the 194 DH lines across the six environments. An augmented design was used in all environments with a single replicate of each DH line and five replicates of the three parents grown in 1-m rows with an inter-row and intra-row spacing of 0.45 and 0.5 m, respectively.

| †Genotype / Parent | Replicate | ‡Environment |      |      |       |      |      | AVE_Score |
|--------------------|-----------|--------------|------|------|-------|------|------|-----------|
|                    |           | ARL          | BHM3 | BHM4 | CLAR5 | HAR7 | HAR8 |           |
| TE1                | 1         | 3            | *    | 4    | *     | *    | 4    | 4         |
| TE2                | 1         | 2            | 6    | 1    | 4     | 4    | 2    | 3         |
| TE3                | 1         | 4            | 4    | 3    | 2     | 2    | 5    | 3         |
| TE4                | 1         | 3            | 2    | 2    | 2     | 6    | 1    | 3         |
| TE5                | 1         | 2            | 3    | 1    | 5     | 4    | 1    | 3         |
| TE6                | 1         | 3            | 4    | 4    | 2     | 2    | 3    | 3         |
| TE7                | 1         | 2            | 2    | 2    | 2     | 4    | 4    | 3         |
| TE8                | 1         | 4            | 2    | 2    | 2     | 4    | 4    | 3         |
| TE9                | 1         | 6            | 6    | *    | 4     | 5    | 3    | 5         |
| TE10               | 1         | 5            | *    | *    | 3     | 5    | 4    | 4         |
| TE11               | 1         | 2            | *    | *    | *     | *    | 5    | 3         |
| TE12               | 1         | 5            | 7    | 2    | 4     | 2    | 2    | 4         |
| TE13               | 1         | 5            | *    | 1    | *     | *    | 2    | 3         |
| TE14               | 1         | 3            | 5    | 2    | 5     | 2    | 2    | 3         |
| TE15               | 1         | 4            | *    | 3    | 4     | *    | *    | 4         |
| TE16               | 1         | 5            | 3    | 2    | 4     | 3    | *    | 3         |
| TE17               | 1         | 4            | 5    | 3    | 3     | 4    | 5    | 4         |
| TE18               | 1         | 4            | 6    | 4    | 5     | 3    | 2    | 4         |
| TE19               | 1         | 2            | 6    | 1    | 4     | *    | *    | 3         |
| TE20               | 1         | 3            | 4    | 2    | 2     | 2    | 5    | 3         |
| TE21               | 1         | 1            | 2    | 2    | 1     | 3    | 3    | 2         |
| TE22               | 1         | 4            | 6    | 5    | 2     | 5    | 1    | 4         |
| TE23               | 1         | 2            | 4    | 3    | 1     | 4    | 2    | 3         |
| TE24               | 1         | 5            | 4    | 2    | 2     | 2    | 3    | 3         |
| TE25               | 1         | 4            | 3    | 3    | 6     | 2    | 4    | 4         |
| TE26               | 1         | 5            | 6    | 3    | 3     | 4    | 2    | 4         |
| TE27               | 1         | 2            | 6    | 3    | 4     | 3    | 2    | 3         |
| TE28               | 1         | 5            | 5    | 3    | 3     | 4    | 3    | 4         |
| TE29               | 1         | 4            | 3    | 4    | 3     | 2    | 3    | 3         |
| TE30               | 1         | 3            | 6    | 3    | 3     | 5    | 3    | 4         |
| TE31               | 1         | 2            | *    | *    | *     | *    | *    | 2         |
| TE32               | 1         | 3            | *    | 2    | 3     | 2    | 3    | 3         |
| TE33               | 1         | 3            | *    | 4    | *     | *    | 2    | 3         |
| TE34               | 1         | 3            | 4    | 3    | 2     | 5    | *    | 4         |
| TE35               | 1         | 4            | 4    | 4    | 2     | 5    | 2    | 3         |
| TE36               | 1         | 4            | 5    | 3    | 3     | 2    | 1    | 3         |
| TE37               | 1         | 2            | 2    | 2    | 2     | 1    | 4    | 2         |
| TE38               | 1         | 5            | *    | *    | *     | *    | 2    | 4         |
| TE40               | 1         | 5            | 6    | 4    | 5     | 3    | 3    | 4         |
| TE41               | 1         | 5            | 6    | 4    | *     | *    | 1    | 4         |
| TE42               | 1         | *            | 4    | 3    | 5     | 4    | 2    | 4         |
| TE43               | 1         | 5            | 6    | 3    | 4     | 5    | 2    | 4         |
| TE44               | 1         | 4            | 4    | 3    | 2     | 3    | 2    | 3         |

|       |   |   |   |   |   |   |   |   |
|-------|---|---|---|---|---|---|---|---|
| TE45  | 1 | 4 | 4 | 1 | 1 | 4 | 1 | 2 |
| TE46  | 1 | 3 | 5 | 3 | 3 | 1 | 4 | 3 |
| TE47  | 1 | 2 | * | 3 | 4 | 2 | * | 3 |
| TE48  | 1 | 4 | 6 | 4 | 2 | 5 | 5 | 4 |
| TE49  | 1 | 3 | 5 | 3 | 2 | 4 | 3 | 3 |
| TE50  | 1 | 2 | 5 | 2 | 2 | 4 | * | 3 |
| TE51  | 1 | 2 | 4 | 3 | 3 | 4 | 3 | 3 |
| TE53  | 1 | 2 | 5 | 4 | 3 | 5 | 3 | 4 |
| TE54  | 1 | 2 | 3 | 3 | 1 | 4 | 1 | 2 |
| TE55  | 1 | 3 | 5 | 2 | 3 | 3 | 1 | 3 |
| TE56  | 1 | 4 | 5 | 3 | 3 | 4 | 1 | 3 |
| TE57  | 1 | 3 | 5 | 3 | 4 | 5 | 1 | 4 |
| TE58  | 1 | 4 | * | 1 | 2 | 2 | * | 2 |
| TE59  | 1 | 2 | 3 | 2 | 2 | 3 | 3 | 3 |
| TE60  | 1 | 4 | 4 | 3 | 2 | 4 | 2 | 3 |
| TE61  | 1 | 3 | 6 | 4 | 3 | 4 | 2 | 4 |
| TE62  | 1 | 2 | 2 | 4 | 2 | 2 | 1 | 2 |
| TE63  | 1 | 3 | 3 | 4 | 2 | 3 | 5 | 3 |
| TE64  | 1 | 4 | 5 | 5 | 2 | 5 | 2 | 4 |
| TE66  | 1 | 2 | 4 | 2 | 3 | 2 | 1 | 2 |
| TE67  | 1 | 5 | 6 | 4 | 4 | 6 | 3 | 5 |
| TE68  | 1 | 3 | 5 | 3 | 4 | 3 | 2 | 3 |
| TE69  | 1 | 3 | 3 | 2 | 2 | 2 | 4 | 3 |
| TE70  | 1 | 5 | 3 | 2 | 3 | 4 | 2 | 3 |
| TE71  | 1 | 2 | 3 | 3 | 2 | 3 | 1 | 2 |
| TE73  | 1 | 2 | 3 | 2 | 1 | 3 | 1 | 2 |
| TE74  | 1 | 3 | 2 | 2 | 1 | 3 | 1 | 2 |
| TE75  | 1 | 3 | 3 | 2 | 4 | 3 | 3 | 3 |
| TE76  | 1 | 3 | 4 | 2 | 1 | * | 1 | 2 |
| TE77  | 1 | 5 | 6 | 3 | 3 | 5 | 3 | 4 |
| TE78  | 1 | 3 | 3 | 3 | 2 | 4 | 3 | 3 |
| TE79  | 1 | 3 | 3 | 1 | 2 | 4 | 2 | 2 |
| TE80  | 1 | 4 | 4 | 3 | 3 | 5 | 3 | 4 |
| TE81  | 1 | 5 | 5 | * | 3 | 4 | 2 | 4 |
| TE83  | 1 | 3 | * | * | * | * | * | 3 |
| TE84  | 1 | 3 | 2 | 2 | 3 | 4 | 2 | 3 |
| TE85  | 1 | 4 | 4 | 1 | 2 | 4 | 2 | 3 |
| TE86  | 1 | 3 | 4 | 2 | 3 | 3 | 3 | 3 |
| TE87  | 1 | 4 | 4 | 6 | 3 | 5 | 4 | 4 |
| TE89  | 1 | 2 | 4 | 3 | 3 | * | 4 | 3 |
| TE90  | 1 | 3 | 6 | 1 | 2 | 2 | 2 | 3 |
| TE91  | 1 | 3 | 5 | 3 | 3 | 4 | 3 | 4 |
| TE92  | 1 | 4 | 4 | 4 | 3 | 3 | 5 | 4 |
| TE93  | 1 | 3 | 3 | 2 | 2 | 5 | 1 | 3 |
| TE94  | 1 | 4 | * | 3 | * | * | 2 | 3 |
| TE95  | 1 | 5 | 4 | 4 | 3 | 4 | 4 | 4 |
| TE96  | 1 | 4 | 4 | 3 | 4 | 4 | 1 | 3 |
| TE97  | 1 | 3 | 4 | 2 | 2 | 3 | * | 3 |
| TE98  | 1 | 3 | 4 | 3 | 4 | 3 | 3 | 3 |
| TE99  | 1 | 4 | 5 | 2 | 3 | 6 | 2 | 4 |
| TE101 | 1 | 3 | 3 | 3 | 2 | 3 | 3 | 3 |

|       |   |   |   |   |   |   |   |   |
|-------|---|---|---|---|---|---|---|---|
| TE102 | 1 | 4 | 6 | 3 | 2 | 5 | 2 | 4 |
| TE103 | 1 | 4 | 5 | 3 | 3 | 3 | 2 | 3 |
| TE104 | 1 | 3 | 4 | 3 | * | 5 | 1 | 3 |
| TE105 | 1 | 2 | 4 | 2 | 2 | 3 | 3 | 3 |
| TE106 | 1 | 4 | * | 4 | 5 | 5 | 4 | 4 |
| TE109 | 1 | * | * | 2 | 4 | * | 1 | 2 |
| TE111 | 1 | 2 | 5 | 4 | * | 2 | 5 | 4 |
| TE112 | 1 | 2 | 6 | 4 | 2 | 3 | * | 3 |
| TE113 | 1 | 3 | 4 | 4 | 2 | 2 | 4 | 3 |
| TE114 | 1 | 4 | 6 | 4 | 2 | 3 | 3 | 4 |
| TE115 | 1 | 2 | 6 | 2 | * | 2 | 2 | 3 |
| TE116 | 1 | 3 | 5 | 4 | * | 2 | * | 4 |
| TE118 | 1 | * | * | 3 | 2 | * | 2 | 2 |
| TE119 | 1 | * | 6 | 2 | * | 5 | * | 4 |
| TE120 | 1 | 3 | 3 | 4 | 4 | 4 | * | 3 |
| TE122 | 1 | 2 | 4 | 1 | 1 | 2 | 1 | 2 |
| TE123 | 1 | 4 | 4 | 3 | 3 | 5 | 4 | 4 |
| TE124 | 1 | 2 | 2 | 3 | 3 | 1 | 5 | 3 |
| TE125 | 1 | 3 | 7 | 2 | * | 2 | 3 | 3 |
| TE126 | 1 | 4 | 5 | 3 | 3 | 2 | 5 | 4 |
| TE127 | 1 | 1 | 3 | 2 | 2 | 2 | 4 | 2 |
| TE128 | 1 | 4 | 4 | 2 | 2 | 4 | 2 | 3 |
| TE129 | 1 | 3 | 4 | 4 | 4 | 3 | 4 | 4 |
| TE130 | 1 | 3 | 3 | 3 | 3 | 5 | 2 | 3 |
| TE131 | 1 | 3 | 3 | 4 | 3 | * | 2 | 3 |
| TE132 | 1 | 2 | 5 | 3 | 2 | 3 | 2 | 3 |
| TE133 | 1 | 3 | 6 | 3 | 2 | 3 | 3 | 3 |
| TE135 | 1 | 2 | 2 | 2 | 2 | * | 1 | 2 |
| TE136 | 1 | 2 | 5 | 2 | * | 3 | * | 3 |
| TE139 | 1 | 3 | 4 | 4 | 3 | 4 | 4 | 4 |
| TE140 | 1 | 4 | 5 | 3 | 4 | 4 | 5 | 4 |
| TE141 | 1 | 3 | 4 | 4 | 3 | 3 | * | 3 |
| TE142 | 1 | 3 | 2 | 3 | 2 | 3 | 2 | 2 |
| TE144 | 1 | 4 | 6 | 3 | 4 | 5 | 1 | 4 |
| TE145 | 1 | 5 | 4 | 5 | 4 | 5 | 2 | 4 |
| TE146 | 1 | 3 | 7 | 4 | 4 | * | 2 | 4 |
| TE147 | 1 | 4 | 5 | 3 | 3 | 5 | 2 | 4 |
| TE148 | 1 | 5 | 7 | 4 | 3 | 5 | 1 | 4 |
| TE149 | 1 | 5 | 5 | 6 | 5 | 6 | 5 | 5 |
| TE150 | 1 | 4 | 6 | 4 | 4 | 6 | 2 | 4 |
| TE151 | 1 | 4 | 8 | 4 | 1 | 2 | 2 | 3 |
| TE152 | 1 | 3 | 5 | 5 | 6 | 2 | 4 | 4 |
| TE153 | 1 | 3 | 6 | 3 | 2 | 4 | 1 | 3 |
| TE155 | 1 | 4 | 6 | 3 | 4 | 6 | 5 | 5 |
| TE158 | 1 | 4 | 7 | * | 4 | 2 | * | 4 |
| EF1   | 1 | * | 3 | 2 | 2 | 3 | 2 | 2 |
| EF3   | 1 | * | 5 | 3 | 2 | 4 | 2 | 3 |
| EF4   | 1 | * | 6 | 4 | 2 | 5 | 4 | 4 |
| EF6   | 1 | * | * | 3 | * | * | 3 | 3 |
| EF7   | 1 | * | 4 | * | 1 | 2 | 2 | 2 |
| EF8   | 1 | * | 4 | 3 | 3 | 1 | 4 | 3 |

|           |   |   |   |   |   |   |   |   |
|-----------|---|---|---|---|---|---|---|---|
| EF9       | 1 | * | 3 | 3 | 2 | 2 | 1 | 2 |
| EF10      | 1 | * | 5 | 5 | 3 | 5 | 2 | 4 |
| EF11      | 1 | * | 5 | 1 | * | 1 | 2 | 2 |
| EF12      | 1 | * | 5 | 1 | * | 3 | 3 | 3 |
| EF13      | 1 | * | 5 | 1 | * | 1 | 3 | 3 |
| EF14      | 1 | * | 5 | 1 | * | 2 | 3 | 3 |
| EF15      | 1 | * | 2 | 2 | 1 | 1 | 4 | 2 |
| EF16      | 1 | * | 5 | 2 | 3 | 2 | 3 | 3 |
| EF17      | 1 | * | 2 | 1 | 1 | 2 | 5 | 2 |
| EF18      | 1 | * | 4 | 3 | 3 | 2 | 5 | 3 |
| EF19      | 1 | * | 5 | 2 | * | 1 | 2 | 3 |
| EF20      | 1 | * | 5 | 3 | 1 | 5 | * | 4 |
| EF21      | 1 | * | 6 | 3 | 2 | 5 | * | 4 |
| EF22      | 1 | * | 2 | * | * | 2 | 2 | 2 |
| EF23      | 1 | * | 4 | 3 | 1 | 3 | 2 | 3 |
| EF24      | 1 | * | 6 | 5 | * | 5 | 2 | 4 |
| EF25      | 1 | * | 5 | 4 | 2 | 6 | 2 | 4 |
| EF26      | 1 | * | 4 | 3 | * | 3 | 1 | 3 |
| EF27      | 1 | * | 4 | 2 | * | 4 | 3 | 3 |
| EF28      | 1 | * | 5 | 4 | * | 3 | 2 | 4 |
| EF29      | 1 | * | 4 | 3 | 3 | 2 | 2 | 3 |
| EF30      | 1 | * | 4 | 2 | 2 | 3 | 5 | 3 |
| EF31      | 1 | * | 4 | 2 | 1 | 4 | 3 | 3 |
| EF32      | 1 | * | 4 | 4 | 3 | 2 | 3 | 3 |
| EF34      | 1 | * | 5 | 2 | * | 1 | 1 | 2 |
| EF35      | 1 | * | 4 | 3 | 2 | 2 | 2 | 3 |
| EF37      | 1 | * | 5 | 3 | 4 | 2 | 1 | 3 |
| EF38      | 1 | * | 5 | 3 | 2 | 4 | * | 3 |
| EF39      | 1 | * | 4 | 2 | * | 2 | * | 3 |
| EF40      | 1 | * | 4 | 1 | 1 | 3 | 2 | 2 |
| EF41      | 1 | * | 5 | 3 | 2 | 2 | * | 3 |
| EF42      | 1 | * | 6 | 3 | 1 | 3 | 4 | 3 |
| EF43      | 1 | * | 5 | 4 | 3 | 2 | 6 | 4 |
| EF44      | 1 | * | 2 | 1 | 2 | 2 | 1 | 1 |
| EF45      | 1 | * | 3 | 2 | * | 1 | 2 | 2 |
| EF46      | 1 | * | 5 | 2 | 1 | 3 | 1 | 2 |
| EF47      | 1 | * | 4 | 1 | 1 | 1 | 1 | 2 |
| EF48      | 1 | * | 3 | 1 | * | 3 | 2 | 2 |
| EF49      | 1 | * | 5 | 1 | 5 | 4 | * | 4 |
| EF50      | 1 | * | 5 | 2 | 4 | * | 1 | 3 |
| EF51      | 1 | * | 4 | 4 | 2 | 4 | 5 | 4 |
| EF53      | 1 | * | 5 | 2 | 3 | 2 | 2 | 3 |
| EF54      | 1 | * | 5 | 3 | * | 4 | 3 | 4 |
| EF55      | 1 | * | 5 | 4 | 2 | 3 | * | 4 |
| EF56      | 1 | * | 3 | 3 | 2 | 3 | * | 3 |
| EF57      | 1 | * | 3 | 2 | 2 | 2 | 4 | 3 |
| EF58      | 1 | * | 5 | 2 | 3 | 2 | * | 3 |
| EF59      | 1 | * | 4 | 3 | 3 | 3 | * | 3 |
| EF65      | 1 | * | 6 | 3 | * | 2 | 4 | 4 |
| Tugela-Dn | 1 | 3 | 6 | 5 | 4 | 5 | 4 | 5 |
| Elands    | 1 | 3 | 3 | 2 | 1 | 1 | 1 | 2 |

|           |   |   |   |   |   |   |   |   |
|-----------|---|---|---|---|---|---|---|---|
| Flamink   | 1 | * | 6 | 3 | 3 | 4 | 1 | 3 |
| Tugela-Dn | 2 | 3 | 6 | 5 | 5 | 5 | 5 | 5 |
| Elands    | 2 | 2 | 3 | 2 | 2 | 2 | 1 | 2 |
| Flamink   | 2 | * | 4 | 3 | 3 | 4 | 3 | 3 |
| Tugela-Dn | 3 | 5 | 4 | * | 5 | 6 | 4 | 5 |
| Elands    | 3 | 2 | 3 | 3 | 1 | 3 | 3 | 3 |
| Flamink   | 3 | * | 5 | 3 | 3 | * | 2 | 3 |
| Tugela-Dn | 4 | 5 | 7 | 5 | 4 | 3 | 6 | 5 |
| Elands    | 4 | 2 | 2 | 2 | 2 | 2 | 2 | 2 |
| Flamink   | 4 | * | 6 | 3 | * | * | 2 | 4 |
| Tugela-Dn | 5 | 5 | 7 | 6 | 7 | 6 | * | 6 |
| Elands    | 5 | 2 | 2 | 3 | 1 | 3 | * | 2 |
| Flamink   | 5 | * | 5 | 3 | * | * | 2 | 3 |

---

†Genotype denotes a DH line. TE denotes a Tugela-Dn × Elands DH line, while EF denotes an Elands × Flamink DH line. Parent denotes the three parental cultivars i.e. Elands, Flamink and Tugela-Dn

‡Environment denotes ARL1 for Arlington 2016, BHM3 for Bethlehem 2016, BHM4 for Bethlehem 2017, CLAR5 for Clarens 2016, HAR7 for Harrismith 2016, and HAR8 for Harrismith 2017.
